# Supplementary material for: Distinct splicing signatures affect converged pathways in myelodysplastic syndrome patients carrying mutations in different splicing regulators
Source: PubMed Central journal article supplement — RNA. 2016 Oct;22(10):1535–49. doi: 10.1261/rna.056101.116 (PMC5029452; doi:10.1261/rna.056101.116), 2016-10
Supplement: supp_056101.116_Supplemental_Information.pdf [file supp_056101.116_Supplemental_Information.pdf]

Figure S1

A

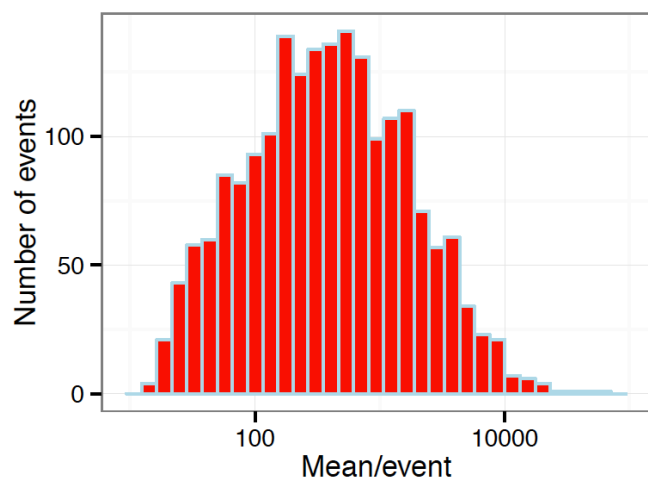

B

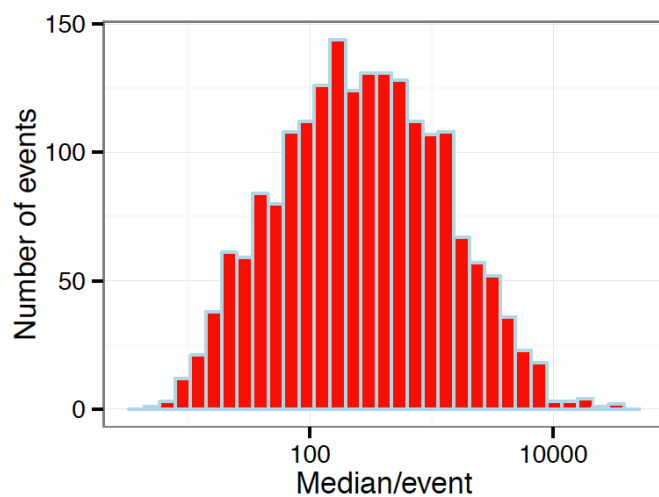

C

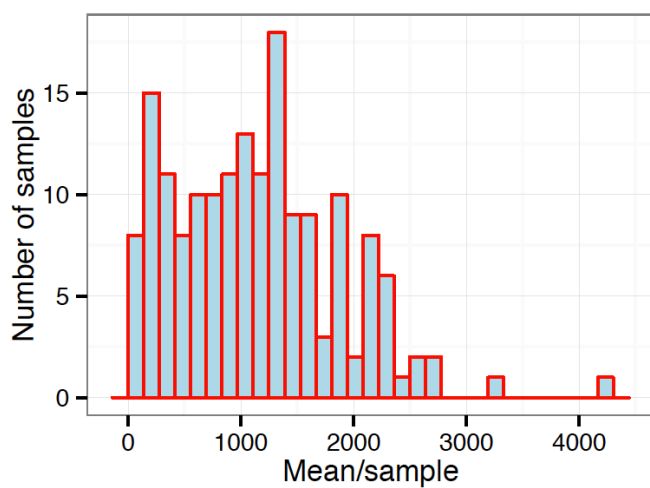

D

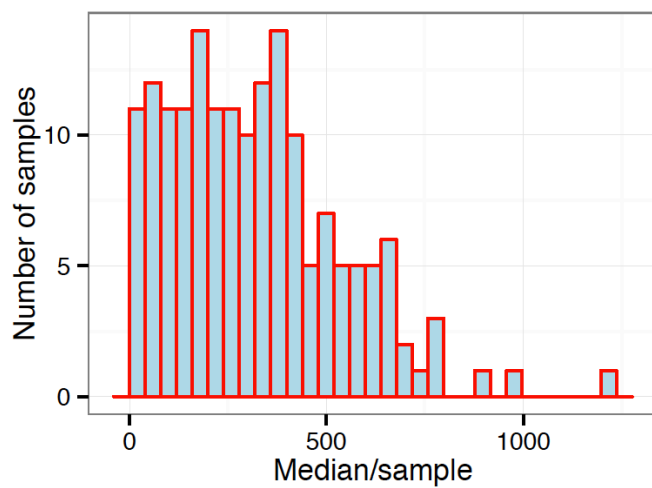

Figure S2

A

## Out-of-frame

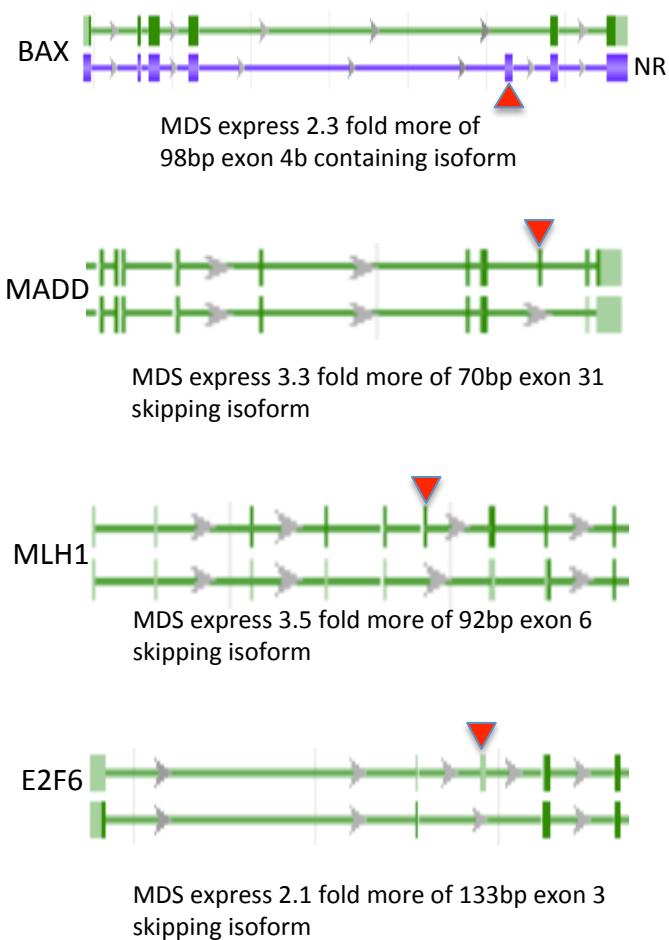

B

## In-frame, in-domain

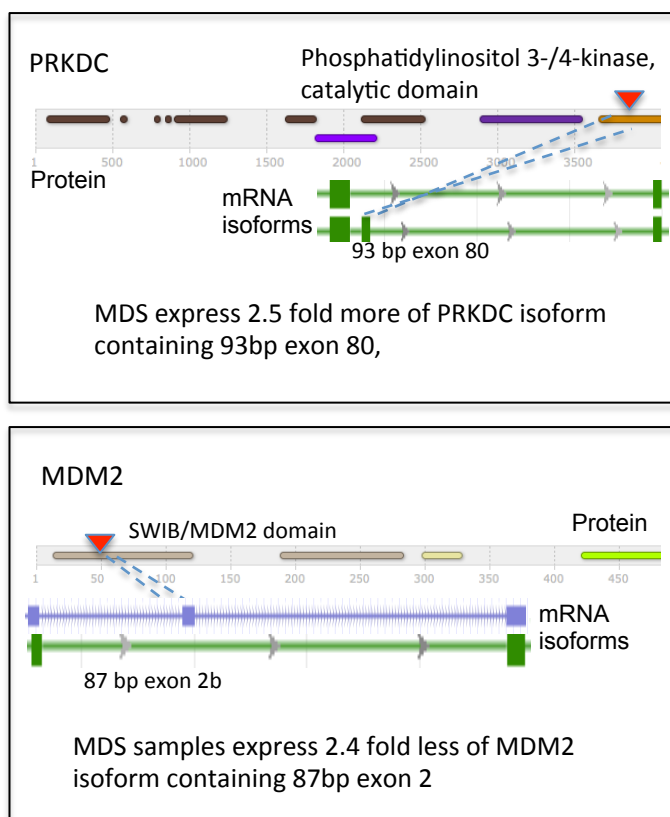

A

## SRSF2-mut

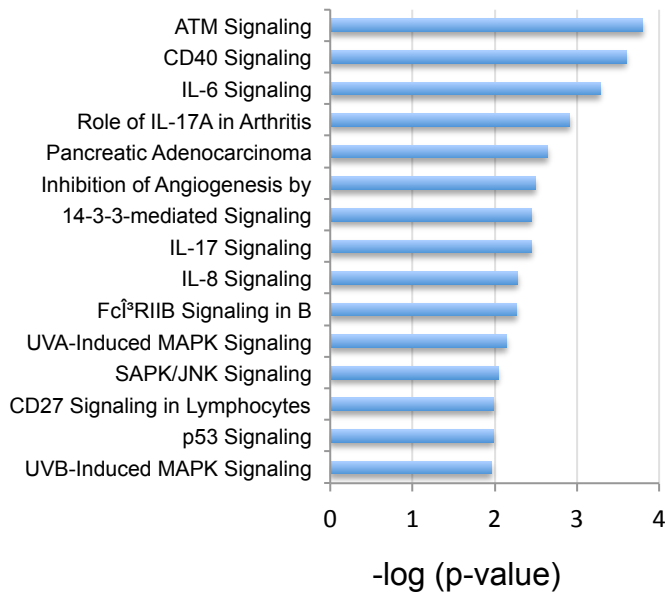

C

## SF3B1-mut

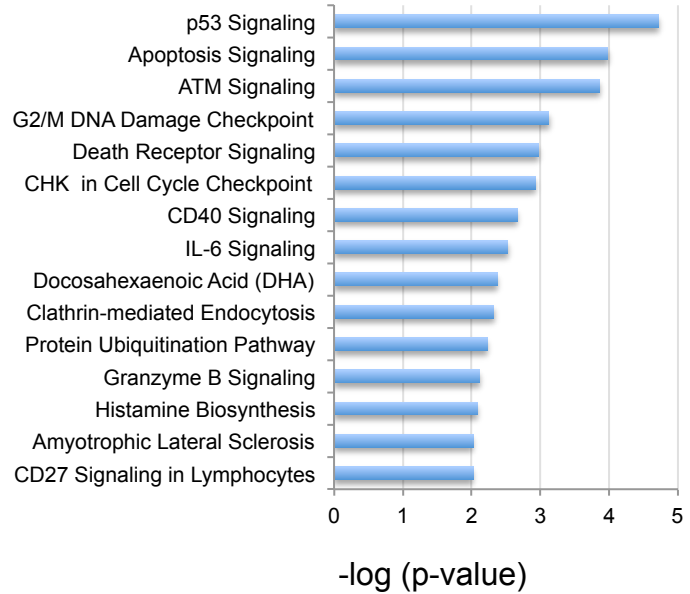

B

## U2AF1-mut

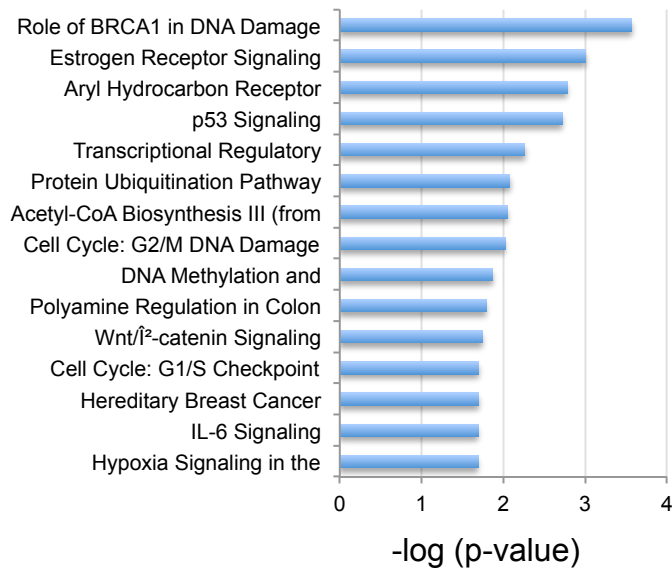

A

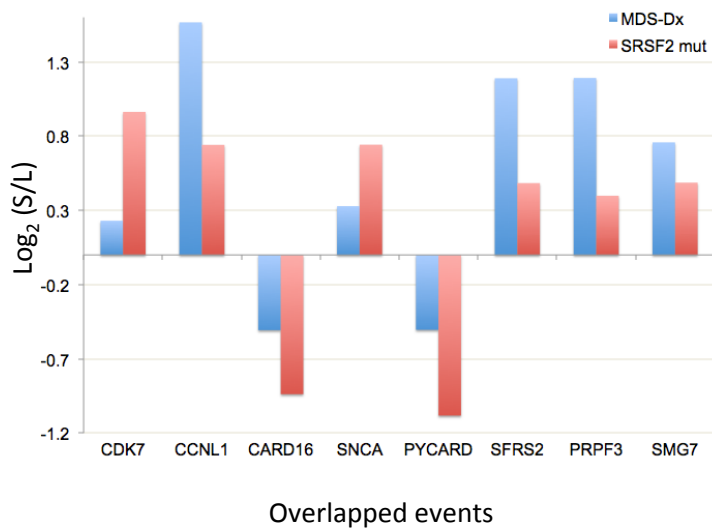

B

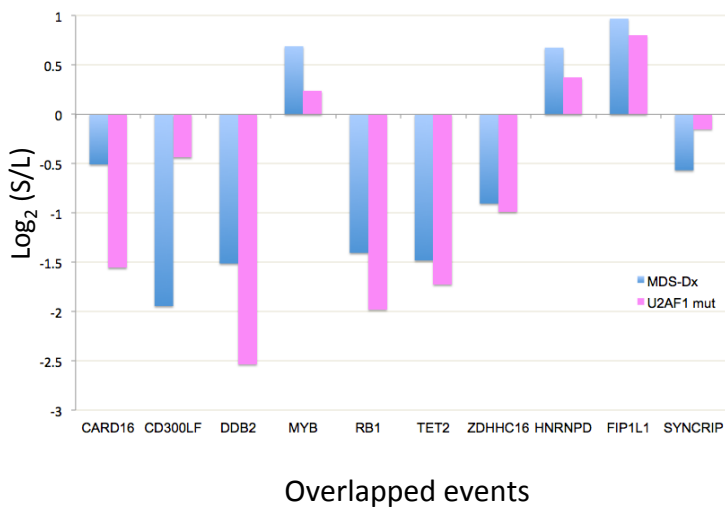

C

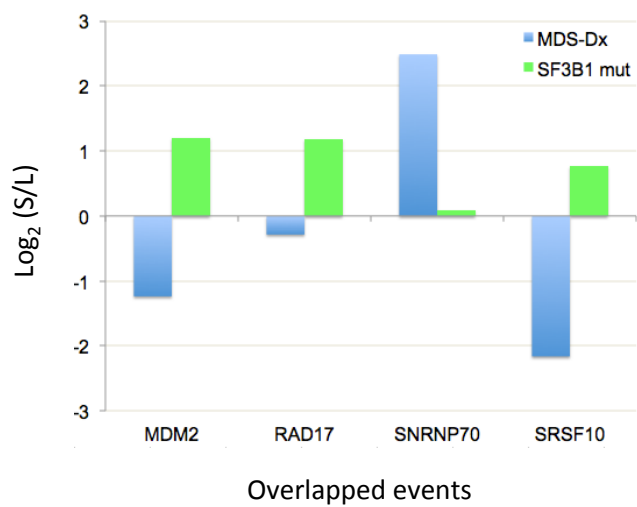

Figure S5

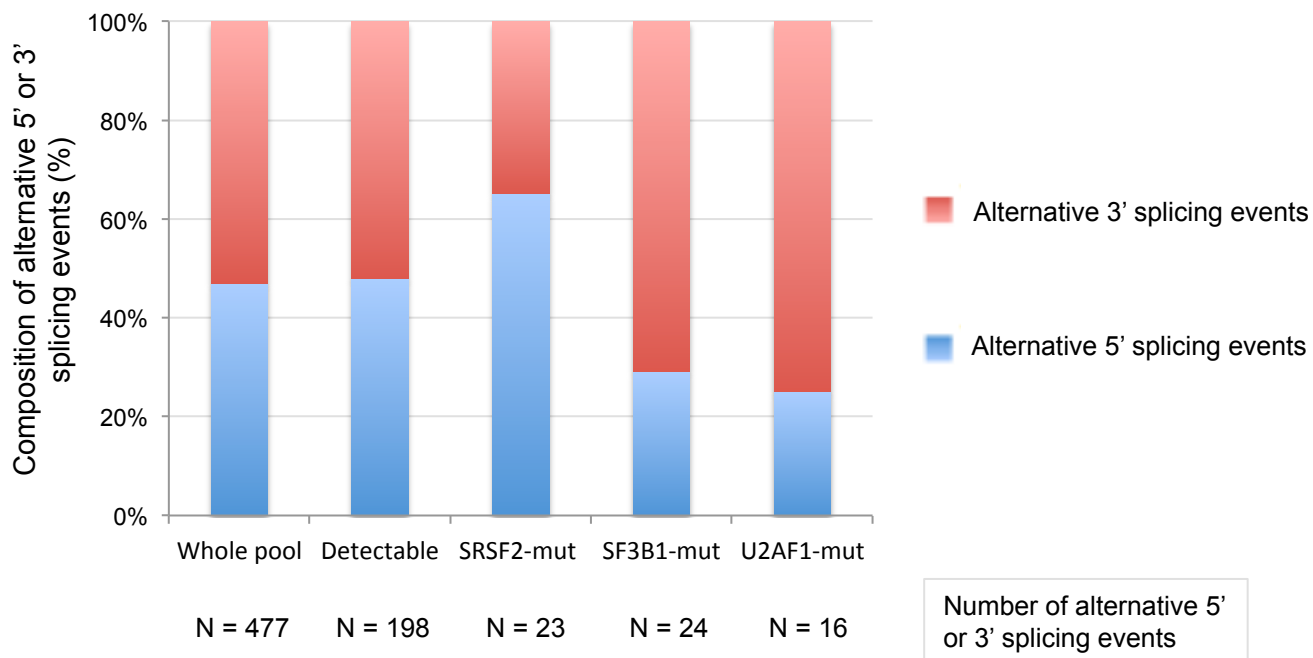

Figure S6

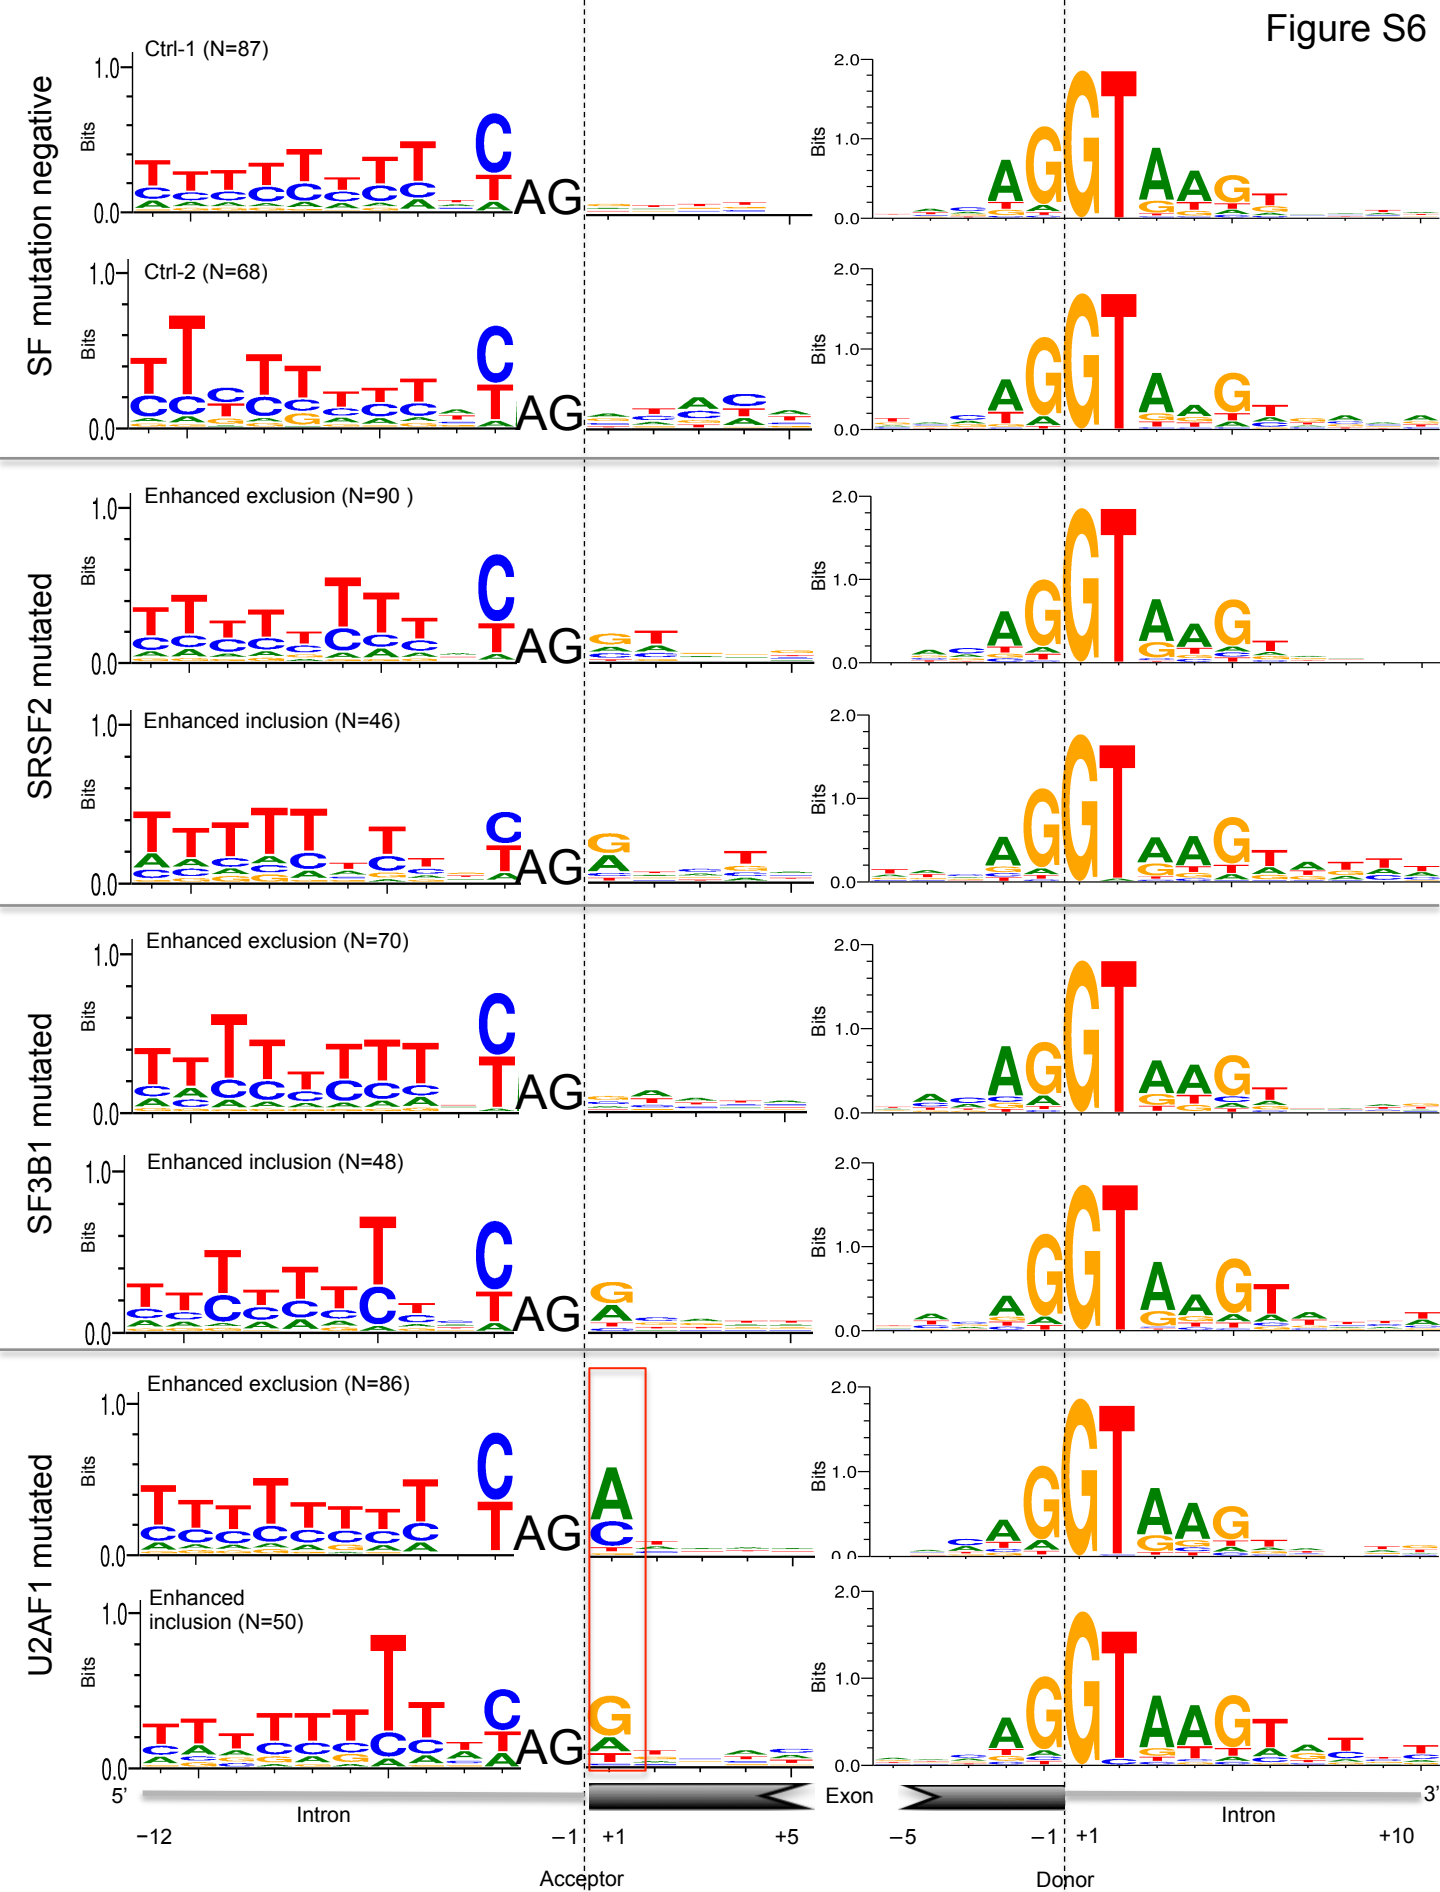

Figure S7

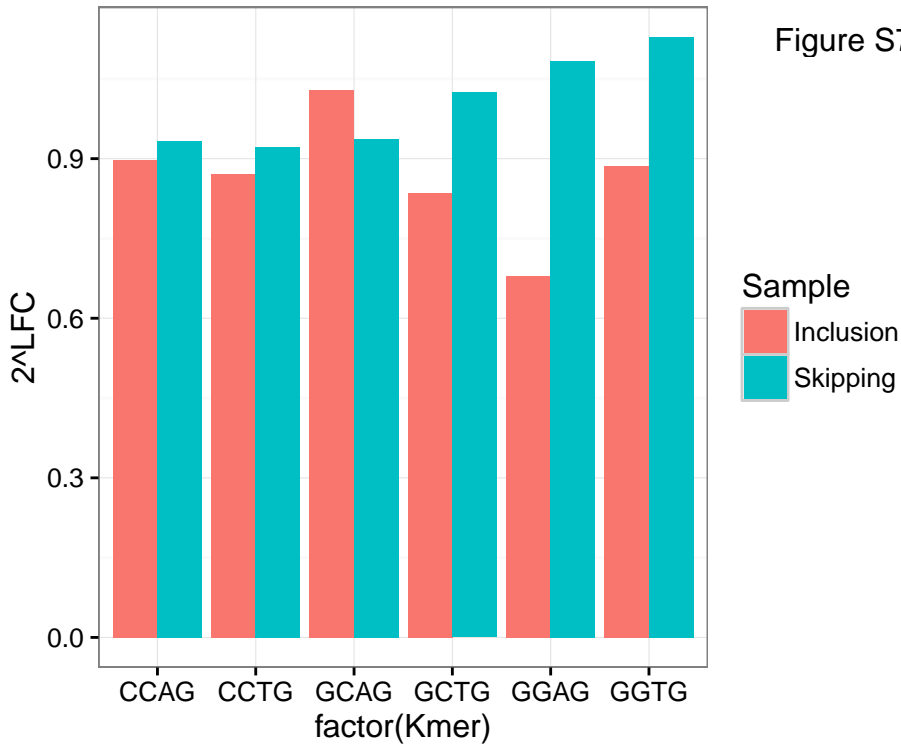

A

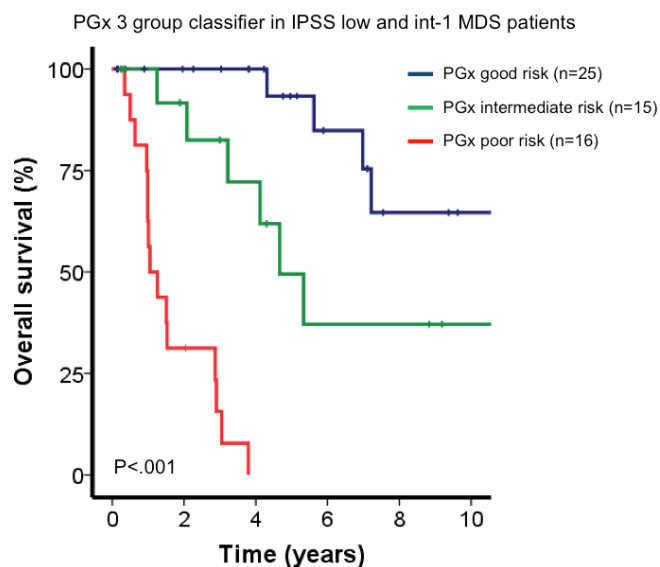

C

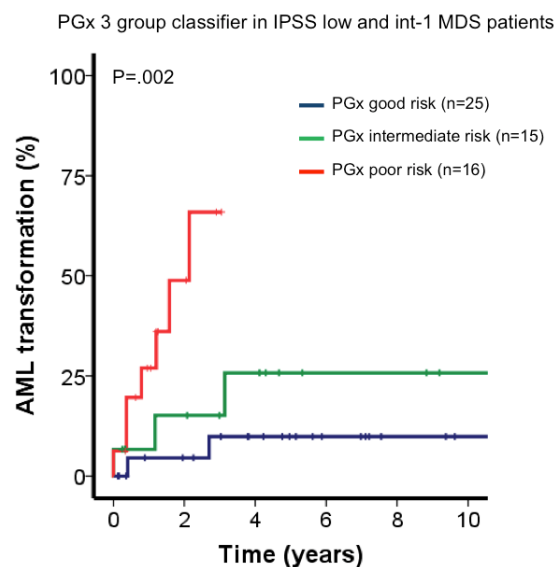

B

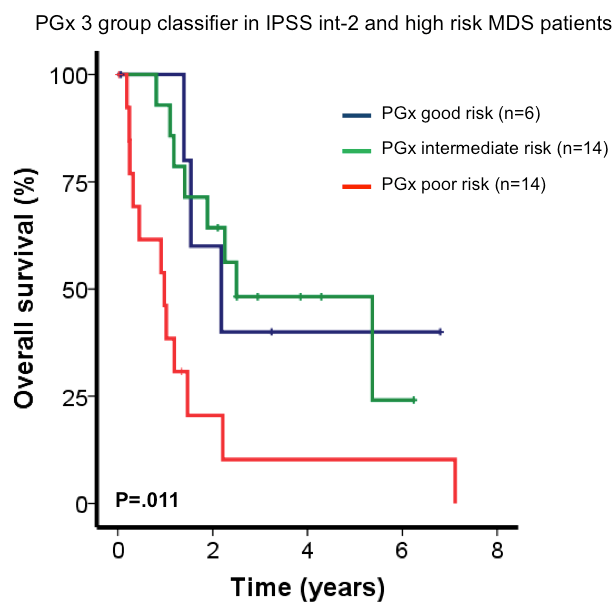

D

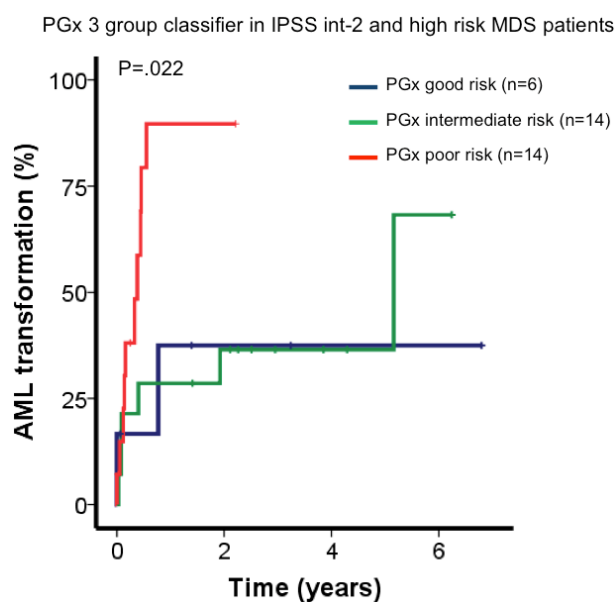

Figure S9

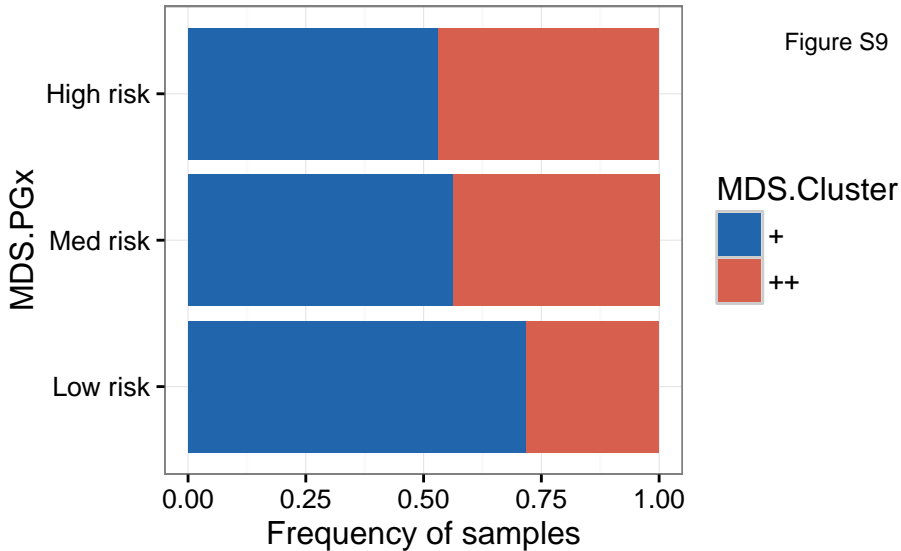

**Table S1.** Overview of sample characteristics

| Sample origin | No. | Selection/phenotype                        | Antibodies                                                                                                                                                                                    |
|---------------|-----|--------------------------------------------|-----------------------------------------------------------------------------------------------------------------------------------------------------------------------------------------------|
| MDS PB        | 22  | Ficoll separated mononuclear cells from PB | CD34 microbead kit<br>CD34-PEcy7, CD38, FITC<br>CD34-PEcy7, CD38 FITC, CD3 PECy7, CD123-APC<br>CD8 FITC, CD56 PE, CD3 PECy7, CD123-APC<br>CD19 APC<br>CD66b FITC, CD15 PE<br>CD14PE, CD3 FITC |
| MDS BM        | 93  | Ficoll separated mononuclear cells from BM |                                                                                                                                                                                               |
| Healthy BM    | 8   | Ficoll separated mononuclear cells from BM |                                                                                                                                                                                               |
| CD34+_BM      | 5   | CD34+                                      |                                                                                                                                                                                               |
| Stem cell     | 1   | Lin-CD34+CD38-                             |                                                                                                                                                                                               |
| CMP           | 2   | CD34+, CD38+, CD123lo, CD45Ra              |                                                                                                                                                                                               |
| T cell        | 5   | CD8-, CD56-, CD3+, CD4+, Lin-              |                                                                                                                                                                                               |
| B cell        | 5   | CD19+                                      |                                                                                                                                                                                               |
| Granulocyte   | 5   | CD66b+, CD15+                              |                                                                                                                                                                                               |
| Monocyte      | 5   | CD14+, CD66b-, CD3-, CD56-                 |                                                                                                                                                                                               |
| PB            | 18  | Ficoll separated mononuclear cells from PB |                                                                                                                                                                                               |

Note: 3 patients were analyzed in duplicate. PB: peripheral blood; BM: bone marrow

**Table S2.** Clinical characteristics of MDS patients

| <b>Characteristic</b>                   | <b>All<br/>(n=112)</b> |
|-----------------------------------------|------------------------|
| <b>Age, years</b>                       |                        |
| Median                                  | 67                     |
| range                                   | 26-92                  |
| <b>Sex</b>                              |                        |
| male - no. (%)                          | 71 (63)                |
| female - no. (%)                        | 41 (37)                |
| <b>WHO-Subtype</b>                      |                        |
| del (5q) - no. (%)                      | 11 (10)                |
| RA - no. (%)                            | 16 (14)                |
| RARS - no. (%)                          | 16 (14)                |
| RCMD - no. (%)                          | 18 (16)                |
| RAEB-1 - no. (%)                        | 11 (10)                |
| RAEB-2 - no. (%)                        | 25 (22)                |
| MDS-U - no. (%)                         | 2 (2)                  |
| Secondary AML, CMML - no. (%)           | 2 (2)                  |
| missing – no. (%)                       | 10 (9)                 |
| <b>Karyotype risk according to IPSS</b> |                        |
| Good - no. (%)                          | 65 (58)                |
| Intermediate - no. (%)                  | 10 (9)                 |
| Poor - no. (%)                          | 19 (17)                |
| Missing data - no. (%)                  | 18 (16)                |
| <b>IPSS risk score</b>                  |                        |
| Low - no. (%)                           | 29 (26)                |
| Int-1 - no. (%)                         | 30 (27)                |
| Int-2 - no. (%)                         | 25 (22)                |
| High - no. (%)                          | 10 (9)                 |
| Missing data - no. (%)                  | 18 (16)                |
| <b>Transfusion dependence</b>           |                        |
| Yes - no. (%)                           | 74 (66)                |
| No - no. (%)                            | 22 (20)                |
| Missing data - no. (%)                  | 16 (14)                |
| <b>Transformation into AML</b>          |                        |
| Yes - no. (%)                           | 31 (28)                |
| No - no. (%)                            | 64 (57)                |
| Missing data - no. (%)                  | 17 (15)                |
| <b>Allogeneic Transplantation</b>       |                        |
| yes - no. (%)                           | 16 (14)                |
| no - no. (%)                            | 87 (78)                |
| Missing data - no. (%)                  | 9 (8)                  |

**Table S3.** Event types detected by RASL-seq oligo pool

| Event type                            | Event sketch                                                                        | Event number |
|---------------------------------------|-------------------------------------------------------------------------------------|--------------|
| Cassette exon                         | 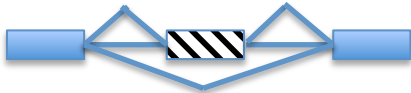   | N=4667       |
| Alternative 5' splice site            | 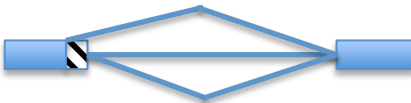   | N=224        |
| Alternative 3' splice site            | 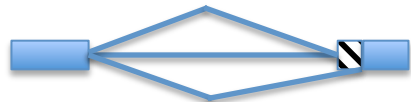   | N=253        |
| Alternative transcription initiation  | 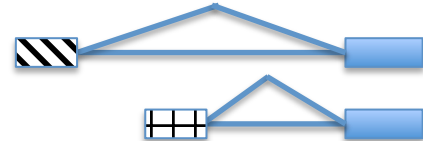   | N=136        |
| Alternative transcription termination | 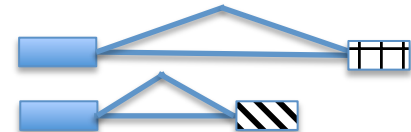  | N=40         |
| Alternative 5' Cassette exon          | 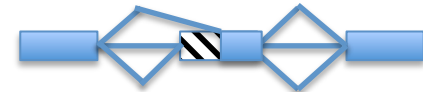 | N=2          |
| Alternative 3' Cassette exon          | 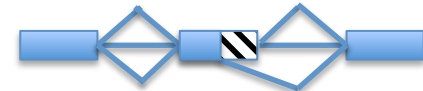 | N=3          |
| Multi-exon skipping                   | 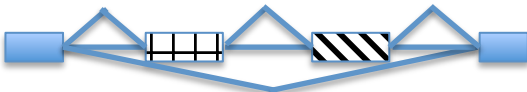 | N=113        |
| Mutually exclusive exon               | 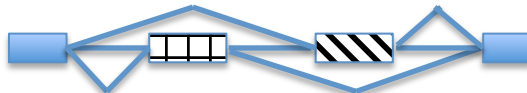 | N=64         |

**Table S4.** RT-PCR validation primers

| Primer Name | Primer sequence        |
|-------------|------------------------|
| DDX50_F     | GACATTATGGAGCTGGAAGC   |
| DDX50_R     | CATCCAGGTCATCTGTAAACAC |
| TFAM_F      | GGAGGGAACTTCCTGATTC    |
| TFAM_R      | TCCTTTTCAGAGTCAGACAG   |
| NUP214_F    | CTCTGCTGTCAAAGTCAACC   |
| NUP214_R    | TCCTGGGTGATTTCTGTACC   |
| RUNX1_F     | CTCAGCCTCAGAGTCAGATG   |
| RUNX1_R1    | GAGAGTCGACTGGAAAGTTCTG |
| RUNX1_R2    | CTGAGTCTCTTCTGAGGATGAG |

**Table S5B.** Genes in pathways enriched in Hemo-SP

| Ingenuity Canonical Pathways                                         | Genes                                     |
|----------------------------------------------------------------------|-------------------------------------------|
| PI3K Signaling in B Lymphocytes                                      | FYN,PLCB1,NFATC2,MALT1,PLEKHA1,ITPR1      |
| Phospholipase C Signaling                                            | FYN,GNAS,PLCB1,NFATC2,ARHGEF1,ITPR1,FNBP1 |
| Regulation of IL-2 Expression in Activated and Anergic T Lymphocytes | SMAD2,FYN,NFATC2,MALT1                    |
| HIPPO signaling                                                      | SMAD2,TJP2,YWHAZ,SKP2                     |
| Cell Cycle: G2/M DNA Damage Checkpoint Regulation                    | YWHAZ,TRIP12,SKP2                         |
| GÎ±q Signaling                                                       | GNAS,PLCB1,NFATC2,ITPR1,FNBP1             |
| fMLP Signaling in Neutrophils                                        | GNAS,PLCB1,NFATC2,ITPR1                   |

**Table S6B.** Genes in pathways enriched in MDS-Dx

| Ingenuity Canonical Pathways                                 | Genes                                                         |
|--------------------------------------------------------------|---------------------------------------------------------------|
| Role of CHK Proteins in Cell Cycle Checkpoint Control        | E2F6, RAD17, MRE11A, TLK1, PPP2R5E, CHEK2, ATM                |
| Role of BRCA1 in DNA Damage Response                         | RB1, E2F6, MRE11A, CHEK2, MLH1, ATM                           |
| p53 Signaling                                                | PRKDC, RB1, ADCK3, MDM2, BAX, CHEK2, ATM                      |
| Cell Cycle: G2/M DNA Damage Checkpoint Regulation            | PRKDC, CDK7, MDM2, CHEK2, ATM                                 |
| Hereditary Breast Cancer Signaling                           | RB1, XPC, MRE11A, DDB2, CHEK2, MLH1, ATM                      |
| ATM Signaling                                                | MDM2, MRE11A, TLK1, CHEK2, ATM                                |
| DNA Double-Strand Break Repair by Homologous Recombination   | ATRX, MRE11A, ATM                                             |
| DNA Double-Strand Break Repair by Non-Homologous End Joining | PRKDC, MRE11A, ATM                                            |
| Cyclins and Cell Cycle Regulation                            | RB1, E2F6, CDK7, PPP2R5E, ATM                                 |
| Aryl Hydrocarbon Receptor Signaling                          | RB1, TRIP11, MDM2, BAX, CHEK2, ATM                            |
| Molecular Mechanisms of Cancer                               | PRKDC, RB1, E2F6, CDK7, MDM2, BAX, NFKBIB, CHEK2, CTNND1, ATM |
| Protein Ubiquitination Pathway                               | USP3, DNAJC21, DNAJC8, HSPH1, DNAJC3, MDM2, DNAJC7, VHL       |
| Role of p14/p19ARF in Tumor Suppression                      | RB1, MDM2, ATM                                                |
| Cell Cycle: G1/S Checkpoint Regulation                       | RB1, E2F6, MDM2, ATM                                          |

**Table S10.** Events overlapped in SRSF2, U2AF1, and SF3B1 mutation related splicing programs

| Gene_symbol     | Description                                                                | Chromosome Location | Event type | Event_position             |
|-----------------|----------------------------------------------------------------------------|---------------------|------------|----------------------------|
| MICAL3          | microtubule associated monooxygenase, calponin and LIM domain containing 3 | 22q11.21            | Cassette   | chr22:16734789-16748643:-  |
| MAP4K4          | mitogen-activated protein kinase kinase kinase 4                           | 2q11.2-q12          | Cassette   | chr2:101853309-101856540:+ |
| GABPB1          | GA binding protein transcription factor, beta subunit 1                    | 15q21.2             | Cassette   | chr15:48380857-48383454:-  |
| PCBP2           | poly(rC) binding protein 2                                                 | 12q13.13            | Cassette   | chr12:52147344-52148827:+  |
| USO1            | USO1 vesicle transport factor                                              | 4q21.1              | Cassette   | chr4:76934078-76939798:+   |
| ITSN            | intersectin 1 (SH3 domain protein)                                         | 21q22.1-q22.2       | Cassette   | chr21:34113497-34120991:+  |
| SLC35A1         | solute carrier family 35 (CMP-sialic acid transporter), member A1          | 6q15                | Cassette   | chr6:88243976-88267594:+   |
| TNFSF12-TNFSF13 | TNFSF12-TNFSF13 readthrough                                                | 17p13.1             | Cassette   | chr17:7395019-7400818:+    |
| PAN3            | PAN3 poly(A) specific ribonuclease subunit                                 | 13q12.2             | Cassette   | chr13:27650072-27692367:+  |
| SETD5           | SET domain containing 5                                                    | 3p25.3              | Cassette   | chr3:9452590-9457139:+     |

**Table S11.** Genes in pathways enriched in SRSF2 mutation-related splicing program

| Ingenuity Canonical Pathways                | Molecules                                  |
|---------------------------------------------|--------------------------------------------|
| ATM Signaling                               | MAPK8, MAPK9, TLK1, TDP1, ATM              |
| CD40 Signaling                              | TANK, MAPK8, MAPK9, MAPKAPK2, ATM          |
| IL-6 Signaling                              | VEGFA, MAPK8, MAPK9, MAPKAPK2, MAP4K4, ATM |
| Role of IL-17A in Arthritis                 | MAPK8, MAPK9, MAPKAPK2, ATM                |
| Pancreatic Adenocarcinoma Signaling         | VEGFA, BCL2L1, MAPK8, MAPK9, ATM           |
| Inhibition of Angiogenesis by TSP1          | VEGFA, MAPK8, MAPK9                        |
| 14-3-3-mediated Signaling                   | STRADA, MAPK8, MAPK9, SNCA, ATM            |
| IL-17 Signaling                             | MAPK8, MAPK9, MAPKAPK2, ATM                |
| IL-8 Signaling                              | VEGFA, BCL2L1, MAPK8, MAPK9, MAP4K4, ATM   |
| Fc $\gamma$ RIIB Signaling in B Lymphocytes | MAPK8, MAPK9, ATM                          |
| UVA-Induced MAPK Signaling                  | BCL2L1, MAPK8, MAPK9, ATM                  |
| SAPK/JNK Signaling                          | MAPK8, MAPK9, MAP4K4, ATM                  |
| CD27 Signaling in Lymphocytes               | BCL2L1, MAPK8, MAPK9                       |
| p53 Signaling                               | BCL2L1, MAPK8, HIPK2, ATM                  |
| UVB-Induced MAPK Signaling                  | MAPK8, MAPK9, ATM                          |

**Table S12.** Genes in pathways enriched in U2AF1 mutation-related splicing program

| Ingenuity Canonical Pathways                               | Molecules                                     |
|------------------------------------------------------------|-----------------------------------------------|
| Role of BRCA1 in DNA Damage Response                       | RB1, FANCC, BRCC3, CHEK2, SMARCA4             |
| Estrogen Receptor Signaling                                | TAF1, CCNC, MED15, HNRNPD, NCOR2, SMARCA4     |
| Aryl Hydrocarbon Receptor Signaling                        | RB1, MDM2, NCOR2, CHEK2, SMARCA4, ARNT        |
| p53 Signaling                                              | RB1, TP53INP1, MDM2, CTNNB1, CHEK2            |
| Transcriptional Regulatory Network in Embryonic Stem Cells | RIF1, MEIS1, STAT3                            |
| Protein Ubiquitination Pathway                             | USO1, USP15, FBXW7, MDM2, BTRC, DNAJC1, UBE2F |
| Acetyl-CoA Biosynthesis III (from Citrate)                 | ACLY                                          |
| Cell Cycle: G2/M DNA Damage Checkpoint Regulation          | MDM2, BTRC, CHEK2                             |
| DNA Methylation and Transcriptional Repression Signaling   | MTA1, DNMT1                                   |
| Polyamine Regulation in Colon Cancer                       | SAT1, CTNNB1                                  |
| Wnt/ $\beta$ -catenin Signaling                            | MAP3K7, MAP4K1, MDM2, BTRC, CTNNB1            |
| Cell Cycle: G1/S Checkpoint Regulation                     | RB1, MDM2, BTRC                               |
| Hereditary Breast Cancer Signaling                         | RB1, FANCC, CHEK2, SMARCA4                    |
| IL-6 Signaling                                             | IL6R, MAP3K7, STAT3, MAP4K4                   |
| Hypoxia Signaling in the Cardiovascular System             | MDM2, UBE2F, ARNT                             |

**Table S13.** Genes in pathways enriched in SF3B1 mutation-related splicing program

| Ingenuity Canonical Pathways            | Molecules                                       |
|-----------------------------------------|-------------------------------------------------|
| p53 Signaling                           | BCL2L1, MDM4, PIK3R1, APAF1, MDM2, CHEK2, FAS   |
| Apoptosis Signaling                     | ACIN1, BCL2L1, APAF1, MAP4K4, FAS, MCL1         |
| ATM Signaling                           | MDM4, MDM2, MRE11A, TLK2, CHEK2                 |
| G2/M DNA Damage Checkpoint Regulation   | MDM4, CDK7, MDM2, CHEK2                         |
| Death Receptor Signaling                | ACIN1, TANK, APAF1, MAP4K4, FAS                 |
| CHK in Cell Cycle Checkpoint Control    | RAD17, MRE11A, TLK2, CHEK2                      |
| CD40 Signaling                          | TANK, PIK3R1, MAP2K3, STAT3                     |
| IL-6 Signaling                          | PIK3R1, MAP2K3, STAT3, MAP4K4, MCL1             |
| Docosahexaenoic Acid (DHA) Signaling    | BCL2L1, PIK3R1, APAF1                           |
| Clathrin-mediated Endocytosis Signaling | PICALM, PIK3R1, SH3GLB1, DAB2, MDM2, SH3KBP1    |
| Protein Ubiquitination Pathway          | USO1, DNAJC21, UBE2L3, DNAJC3, MDM2, PSMA3, VHL |
| Granzyme B Signaling                    | NUMA1, APAF1                                    |
| Histamine Biosynthesis                  | HDC                                             |
| Amyotrophic Lateral Sclerosis Signaling | BCL2L1, PIK3R1, CASP1, APAF1                    |
| CD27 Signaling in Lymphocytes           | BCL2L1, APAF1, MAP2K3                           |

**Table S14.** MDS-PGx Associated With Patient Survival Identified Using Coxnet

| Gene_symbol | Description                                                                       | Event_type | Event_position             | In or out of frame* | Within frame (Yes/No) |
|-------------|-----------------------------------------------------------------------------------|------------|----------------------------|---------------------|-----------------------|
| BCAS3       | breast carcinoma amplified sequence 3                                             | Cassette   | chr17:56800637-56824119:+  | In frame            | No                    |
| PROM1       | prominin 1                                                                        | Cassette   | chr4:15644230-15649666:-   | In frame            | N/A                   |
| RNF14       | ring finger protein 14                                                            | Cassette   | chr5:141333491-141338051:+ | Out of frame        |                       |
| MBTD1       | mbt domain containing 1                                                           | Cassette   | chr17:46657569-46692194:-  | Out of frame        |                       |
| CSNK1E      | casein kinase 1, epsilon                                                          | Cassette   | chr22:37087511-37106320:-  | In frame            | N/A                   |
| GOLM1       | golgi membrane protein 1                                                          | Cassette   | chr9:87851307-87882146:-   | Out of frame        |                       |
| CCM2        | cerebral cavernous malformation 2                                                 | Cassette   | chr7:45006487-45070041:+   | In frame            | Yes                   |
| CDCA2       | cell division cycle associated 2                                                  | Cassette   | chr8:25383413-25393345:+   | In frame            | No                    |
| TAF4B       | TAF4b RNA polymerase II, TATA box binding protein (TBP)-associated factor, 105kDa | Cassette   | chr18:22127493-22149190:+  | In frame            | Yes                   |
| SLC35A1     | solute carrier family 35 (CMP-sialic acid transporter), member A1                 | Cassette   | chr6:88243976-88267594:+   | Out of frame        |                       |
| ABI2        | abl-interactor 2                                                                  | Cassette   | chr2:203940012-203953175:+ | Out of frame        |                       |

\* related events are in or out of frame

\*\* For in frame events, if they are located within a reported functional protein domain/ N/A: no available domain information

**Table S15.** Descriptive statistics for clinical covariates among risk groups classified by MDS-PGx

|                     | PGx good risk (n=29) | PGx intermediate risk (n=29) | PGx poor risk (n=30) | Total (n=88)* | p-value |
|---------------------|----------------------|------------------------------|----------------------|---------------|---------|
| <b>IPSS</b>         |                      |                              |                      |               | 0.009** |
| low risk            | 14(48.3%)            | 10(34.5%)                    | 2(6.7%)              | 26(29.5%)     |         |
| intermediate-1 risk | 8(27.6%)             | 6(20.7%)                     | 14(46.7%)            | 28(31.8%)     |         |
| intermediate-2 risk | 6(20.7%)             | 10(34.5%)                    | 10(33.3%)            | 26(29.5%)     |         |
| high risk           | 1(3.4%)              | 3(10.3%)                     | 4(13.3%)             | 8(9.1%)       |         |
| <b>Age</b>          | 60.34(11.57)         | 67.83(9.50)                  | 67.40(10.86)         | 65.22(11.10)  | 0.014*  |
| <b>Hgb</b>          | 9.94(1.55)           | 9.09(2.02)                   | 8.80(1.42)           | 9.27(1.73)    | 0.030*  |
| <b>Blasts.BM</b>    |                      |                              |                      |               | 0.304   |
| <5%                 | 22(75.9%)            | 15(51.7%)                    | 17(56.7%)            | 54(61.4%)     |         |
| 5%-10%              | 2(6.9%)              | 7(24.1%)                     | 5(16.7%)             | 14(15.9%)     |         |
| 10%-20%             | 5(17.2%)             | 7(24.1%)                     | 8(26.7%)             | 20(22.7%)     |         |
| >20%                | 0(0.0%)              | 0(0.0%)                      | 0(0.0%)              | 0(0.0%)       |         |
| <b>Cytogenetics</b> |                      |                              |                      |               | 0.718   |
| low risk            | 20(69.0%)            | 21(72.4%)                    | 19(63.3%)            | 60(68.2%)     |         |
| intermediate risk   | 5(17.2%)             | 2(6.9%)                      | 4(13.3%)             | 11(12.5%)     |         |
| high risk           | 4(13.8%)             | 6(20.7%)                     | 7(23.3%)             | 17(19.3%)     |         |

\* only 88 out of 96 patients with all the clinical information were analyzed

Mean (SD) for continuous data. Count (%) for categorical data.

p-values are calculated based on a F-test for continuous variable, and a Fisher's exact test for categorical variable.

Hgb: Hemoglobin; BM: bone marrow

**Table S16.** Univariate Cox regression model analysis for MDS-PGx, IPSS, Age, Hgb, Blasts-BM, Cytogenetics, and Gender

|                     | <b>Comparator</b>   | <b>Odds Ratio(OR)</b> | <b>95% CI for OR</b> | <b>Pr(&gt; z )</b> | <b>LRT</b> |
|---------------------|---------------------|-----------------------|----------------------|--------------------|------------|
| <b>MDS-PGx</b>      | good risk           |                       |                      |                    | <.001      |
|                     | intermediate risk   | 2.4                   | [0.91,6.33]          | 0.077              |            |
|                     | poor risk           | 12.91                 | [5.16,32.32]         | <.001              |            |
| <b>IPSS</b>         | low risk            |                       |                      |                    | 0.002      |
|                     | intermediate-1 risk | 2.31                  | [1.01,5.30]          | 0.049              |            |
|                     | intermediate-2 risk | 2.63                  | [1.14,6.05]          | 0.023              |            |
|                     | high risk           | 7.74                  | [2.77,21.63]         | <.001              |            |
| <b>Age</b>          | < 67                |                       |                      |                    | 0.032      |
|                     | ≥ 67                | 1.91                  | [1.05,3.48]          | 0.034              |            |
| <b>Hgb</b>          | < 8                 |                       |                      |                    | 0.092      |
|                     | 8 ≤ Hgb <10         | 0.57                  | [0.28,1.16]          | 0.121              |            |
|                     | Hgb ≥10             | 0.4                   | [0.18,0.90]          | 0.026              |            |
| <b>Blasts-BM</b>    | < 5%                |                       |                      |                    | 0.079      |
|                     | 5%-10%              | 2.19                  | [0.96,4.96]          | 0.061              |            |
|                     | > 10%-20%           | 1.88                  | [0.96,3.71]          | 0.068              |            |
| <b>Cytogenetics</b> | low risk            |                       |                      |                    | 0.108      |
|                     | intermediate risk   | 1.43                  | [0.59,3.47]          | 0.433              |            |
|                     | high risk           | 2.14                  | [1.08,4.22]          | 0.028              |            |
| <b>Gender</b>       | male                |                       |                      |                    | 0.218      |
|                     | female              | 0.68                  | [0.36,1.27]          | 0.228              |            |

LTR: likelihood ratio test (LRT)

Variables with more than 2 categories: Odds ratios greater than or less than 1 indicate an increased or decreased risk, respectively, of an event for the category listed compared to the category listed in the first row of each variable, which has a OR of 1.0.

Variabels with 2 categories: Odds ratios greater than or less than 1 indicate an increased or decreased risk, respectively, of an event for the first category listed.

Hgb: Hemoglobin, BM: bone marrow

**Table S17.** Baseline characteristics of patients according to MDS-PGx score

|                                   | good risk | intermediate risk | poor risk | p value |
|-----------------------------------|-----------|-------------------|-----------|---------|
|                                   | (n=32)    | (n=32)            | (n=32)    |         |
| <b>Age</b>                        |           |                   |           | 0.17    |
| median (years)                    | 65        | 68                | 66        |         |
| <b>Sex</b>                        |           |                   |           | 0.097   |
| male - no. (%)                    | 19 (59)   | 17 (53)           | 25 (78)   |         |
| female - no. (%)                  | 13 (41)   | 15 (47)           | 7 (22)    |         |
| <b>IPSS risk score</b>            |           |                   |           | 0.006   |
| low - no. (%)                     | 16 (52)   | 9 (31)            | 2 (7)     |         |
| intermediate I - no. (%)          | 9 (29)    | 6 (21)            | 14 (47)   |         |
| intermediate II - no. (%)         | 5 (16)    | 10 (35)           | 10 (33)   |         |
| high - no. (%)                    | 1 (3)     | 4 (14)            | 4 (13)    |         |
| <b>WHO type</b>                   |           |                   |           | 0.274   |
| RA/RCMD - no. (%)                 | 13 (41)   | 5 (16)            | 9 (28)    |         |
| RARS/RCMD-RS - no. (%)            | 7 (22)    | 4 (13)            | 5 (16)    |         |
| 5q- syndrome - no. (%)            | 3 (9)     | 5 (16)            | 3 (9)     |         |
| RAEBI or II - no. (%)             | 6 (19)    | 16 (50)           | 12 (38)   |         |
| Unknown - no. (%)                 | 3 (9)     | 2 (6)             | 3 (9)     |         |
| <b>Blasts in BM</b>               |           |                   |           | 0.113   |
| <5% - no. (%)                     | 26 (81)   | 16 (52)           | 18 (56)   |         |
| 5-9% - no. (%)                    | 2 (6)     | 7 (23)            | 5 (16)    |         |
| 10-20% - no. (%)                  | 4 (13)    | 8 (26)            | 9 (28)    |         |
| <b>Blasts in PB</b>               |           |                   |           | 0.533   |
| <5% - no. (%)                     | 32 (100)  | 29 (94)           | 31 (97)   |         |
| 5-9% - no. (%)                    | 0 (0)     | 1 (3)             | 1 (3)     |         |
| 10-20% - no. (%)                  | 0 (0)     | 1 (3)             | 0 (0)     |         |
| <b>Cytogenetic risk (IPSS)</b>    |           |                   |           | 0.687   |
| good - no. (%)                    | 21 (70)   | 20 (69)           | 20 (65)   |         |
| intermediate - no. (%)            | 5 (17)    | 2 (7)             | 4 (13)    |         |
| high risk - no. (%)               | 4 (13)    | 7 (24)            | 7 (23)    |         |
| <b>Transfusion dependency</b>     |           |                   |           | 0.115   |
| no - no. (%)                      | 12 (38)   | 7 (22)            | 5 (16)    |         |
| yes - no. (%)                     | 20 (63)   | 25 (78)           | 27 (84)   |         |
| <b>Allogeneic Transplantation</b> |           |                   |           | 0.377   |
| no - no. (%)                      | 25 (78)   | 26 (81)           | 29 (91)   |         |
| yes - no. (%)                     | 7 (22)    | 6 (19)            | 3 (9)     |         |
| <b>SF3B1</b>                      |           |                   |           | 0.43    |
| wildtype - no. (%)                | 22 (69)   | 22 (69)           | 26 (81)   |         |
| mutated - no. (%)                 | 10 (31)   | 10 (31)           | 6 (6)     |         |
| <b>SRSF2</b>                      |           |                   |           | 0.006   |
| wildtype - no. (%)                | 29 (91)   | 25 (78)           | 18 (56)   |         |
| mutated - no. (%)                 | 3 (9)     | 7 (22)            | 14 (44)   |         |
| <b>U2AF1</b>                      |           |                   |           | 0.751   |
| wildtype - no. (%)                | 28 (88)   | 29 (91)           | 27 (84)   |         |
| mutated - no. (%)                 | 4 (13)    | 3 (9)             | 5 (16)    |         |

|                    |          |          |          |       |
|--------------------|----------|----------|----------|-------|
| <b>ZRSR2</b>       |          |          |          | 0.594 |
| wildtype - no. (%) | 18 (95)  | 19 (86)  | 26 (93)  |       |
| mutated - no. (%)  | 1 (5)    | 3 (14)   | 2 (7)    |       |
| <b>ASXL1</b>       |          |          |          | 0.299 |
| wildtype - no. (%) | 28 (88)  | 24 (77)  | 23 (72)  |       |
| mutated - no. (%)  | 4 (12)   | 7 (23)   | 9 (28)   |       |
| <b>RUNX1</b>       |          |          |          | 0.332 |
| wildtype - no. (%) | 32 (100) | 27 (96)  | 29 (100) |       |
| mutated - no. (%)  | 0 (0)    | 1 (3)    | 0 (0)    |       |
| <b>IDH1</b>        |          |          |          | 0.587 |
| wildtype - no. (%) | 31 (97)  | 30 (94)  | 29 (91)  |       |
| mutated - no. (%)  | 1 (3)    | 2 (6)    | 3 (9)    |       |
| <b>IDH2</b>        |          |          |          | n.a.  |
| wildtype - no. (%) | 32 (100) | 32 (100) | 32 (100) |       |
| mutated - no. (%)  | 0 (0)    | 0 (0)    | 0 (0)    |       |
| <b>NPM1</b>        |          |          |          | 0.352 |
| wildtype - no. (%) | 32 (100) | 30 (97)  | 32 (100) |       |
| mutated - no. (%)  | 0 (0)    | 1 (3)    | 0 (0)    |       |
| <b>DNMT3A</b>      |          |          |          | 0.595 |
| wildtype - no. (%) | 30 (97)  | 32 (100) | 31 (97)  |       |
| mutated - no. (%)  | 1 (3)    | 0 (0)    | 1 (3)    |       |

## Supplemental information

### Figure Legends

**Figure S1.** Overview of the distribution of RASL-seq sequence counts by samples and events. (A) The mean and (B) median distribution of RASL-seq sample counts per event. (C) The mean and (D) median distribution of RASL-seq event counts per sample.

**Figure S2.** Effect of alternatively spliced events in the MDS-Dx gene panel on gene product function. (A) Demonstration of the four examples of out-of-frame, alternatively spliced events found in the MDS-Dx panel. (B) Demonstration of two examples of in-frame events from the MDS-Dx panel, whose alternatively spliced events are located inside of functional protein domains. Green: coding region; light green: non-coding region. Violet: non-coding RNA. Grey arrowhead: transcription direction. Red triangle: alternatively spliced exon. The top isoform shows the events enriched in normal samples, while the bottom isoform shows the events enriched in MDS samples.

**Figure S3.** Pathway analysis of splicing factor mutation-related programs. Ingenuity IPA analysis of *SRSF2* (A), *U2AF1* (B), and *SF3B1* (C) mutation related splicing programs, respectively.

**Figure S4.** Comparison of splicing factor mutation-related programs with MDS-Dx. Events related to disease progression in *SRSF2*-mutated (A), *U2AF1*-mutated (B), and *SF3B1*-mutated (C) programs were compared to that of MDS-Dx.

**Figure S5.** Influences of splicing factor mutations on alternative 5' and 3' splicing. The number of alternative 5' or alternative 3' splicing events in control (total pool, and detectable pool) was compared with that in different splicing factor mutation-related programs.

**Figure S6.** Acceptor and donor site consensus sequence analysis of splicing factor mutation-related splicing events. The consensus acceptor and donor sequences of the isoforms in specific splicing factor-mutation induced programs (with average event-ratio change > 1.5 fold) were collected by extracting 30 bps of exon sequences neighboring the acceptor and donor junctions together with related 200 bps of upstream and downstream intron sequences. The logo of base enrichment was generated using Sequencing Logo. Ctrl: control.

**Figure S7.** Indemnification of enriched motifs in the *SRSF2* mutation-affected splicing program. We first identified 140 increased exon inclusion and 123 increased skipping events that were linked to *SRSF2* mutations ( $p < 0.01$ ,  $|\text{Fold Change}| \geq 2$ ). We next calculated relative 4-mer enrichment over random background between the two groups, showing selective enrichment of GGNG motifs in induced exon skipping events.

**Figure S8.** IPSS lower risk and higher risk MDS patients restratified by their MDS-PGx score. (A) Overall survival of IPSS lower risk patients (IPSS-Low and Intermediate-1) reclassified into 3 risk groups by the MDS-PGx score. (B) Overall survival of IPSS

higher risk patients (IPSS Intermediate-2, and High) reclassified into 3 risk groups by the MDS-PGx score. (C) Time to AML transformation of IPSS lower risk patients (IPSS-Low and Intermediate-1) reclassified into 3 risk groups by the MDS-PGx score. (D) Time to AML transformation of IPSS higher risk patients (IPSS Intermediate-2, and High) reclassified into 3 risk groups by the MDS-PGx score.

### **List of Supplemental Tables**

Table S1. Overview of characteristics of patient samples

Table S2. Clinical characteristics of MDS patients

Table S3. Composition of RASL-seq targeted events

Table S4. RT-PCR validation primers

Table S5A. Events identified in the cell lineage-specific splicing panel (Hemo-SP)

Table S5B. Genes in pathways enriched in Hemo-SP

Table S6A. Events identified in the MDS-related splicing program (MDS-Dx)

Table S6B. Genes in pathways enriched in MDS-Dx

Table S7. Events identified in the SRSF2 mutation-related splicing program

Table S8. Events identified in the U2AF1 mutation-related splicing program

Table S9. Events identified in the SF3B1 mutation-related splicing program

Table S10. Overlapped events of U2AF1, SRSF2, and SF3B1 mutation-induced splicing programs

Table S11. Genes in pathways enriched in the SRSF2 mutation-related splicing program

Table S12. Genes in pathways enriched in the U2AF1 mutation-related splicing program

Table S13. Genes in pathways enriched in the SF3B1 mutation-related splicing program

Table S14. MDS-PGx associated with patient survival identified using Coxnet

Table S15. Descriptive statistics of clinical covariates among risk groups classified by MDS-PGx

Table S16. Univariate Cox regression model analysis of MDS-PGx, IPSS, Age, Hgb, Blasts-BM, Cytogenetics, and Gender

Table S17. Baseline characteristics of patients according to MDS-PGx score.
